# Supplementary material for: Fabricating Polymer/Surfactant/Cyclodextrin Hybrid Particles for Possible Nose-to-Brain Delivery of Ropinirole Hydrochloride: In Vitro and Ex Vivo Evaluation
Source: MDPI journal article supplement (doi:10.3390/ijms25021162), 2024-01-18
Supplement: s1 [file s1]

## SUPPLEMENTARY MATERIALS

# Fabricating Polymer/Surfactant/Cyclodextrin Hybrid Particles for Possible Nose-To-Brain Delivery of Ropinirole Hydrochloride: In Vitro and Ex Vivo Evaluation

Elmina-Marina Saitani <sup>1</sup>, Natassa Pippa <sup>1</sup>, Diego Romano Perinelli <sup>2</sup>, Aleksander Forys <sup>3</sup>, Paraskevi Papakyriakopoulou <sup>1</sup>, Nefeli Lagopati <sup>4,5</sup>, Giulia Bonacucina <sup>2</sup>, Barbara Trzebicka <sup>3</sup>, Maria Gazouli <sup>4</sup>, Stergios Pispas <sup>6</sup> and Georgia Valsami <sup>1,\*</sup>

<sup>1</sup> Department of Pharmacy, School of Health Sciences, National and Kapodistrian University of Athens, Panepistimiopolis, 15771 Zografou, Greece; elminasait@pharm.uoa.gr (E.-M.S.); natpippa@pharm.uoa.gr (N.P.); ppapakyr@pharm.uoa.gr (P.P.); valsami@pharm.uoa.gr (G.V.)

<sup>2</sup> School of Pharmacy, Chemistry Interdisciplinary Project (CHIP), University of Camerino, Via Madonna delle Carceri, 62032 Camerino, Italy; diego.perinelli@unicam.it (D.R.P.); giulia.bonacucina@unicam.it (G.B.)

<sup>3</sup> Centre of Polymer and Carbon Materials, Polish Academy of Sciences, 34, M. Curie-Skłodowskiej St, 41-819 Zabrze, Poland; aforys@cmpw-pan.pl (A.F.); barbara.trzebicka@cmpw-pan.edu.pl (B.T.)

<sup>4</sup> Laboratory of Biology, Department of Basic Medical Science, School of Medicine, National and Kapodistrian University of Athens, 11527 Athens, Greece; nlagopati@med.uoa.gr (N.L.); mgazouli@med.uoa.gr (M.G.)

<sup>5</sup> Biomedical Research Foundation, Academy of Athens, 11527 Athens, Greece

<sup>6</sup> Theoretical and Physical Chemistry Institute, National Hellenic Research Foundation, 48 Vassileos Constantinou Avenue, 11635 Athens, Greece; pispas@eie.gr

\* Correspondence: valsami@pharm.uoa.gr

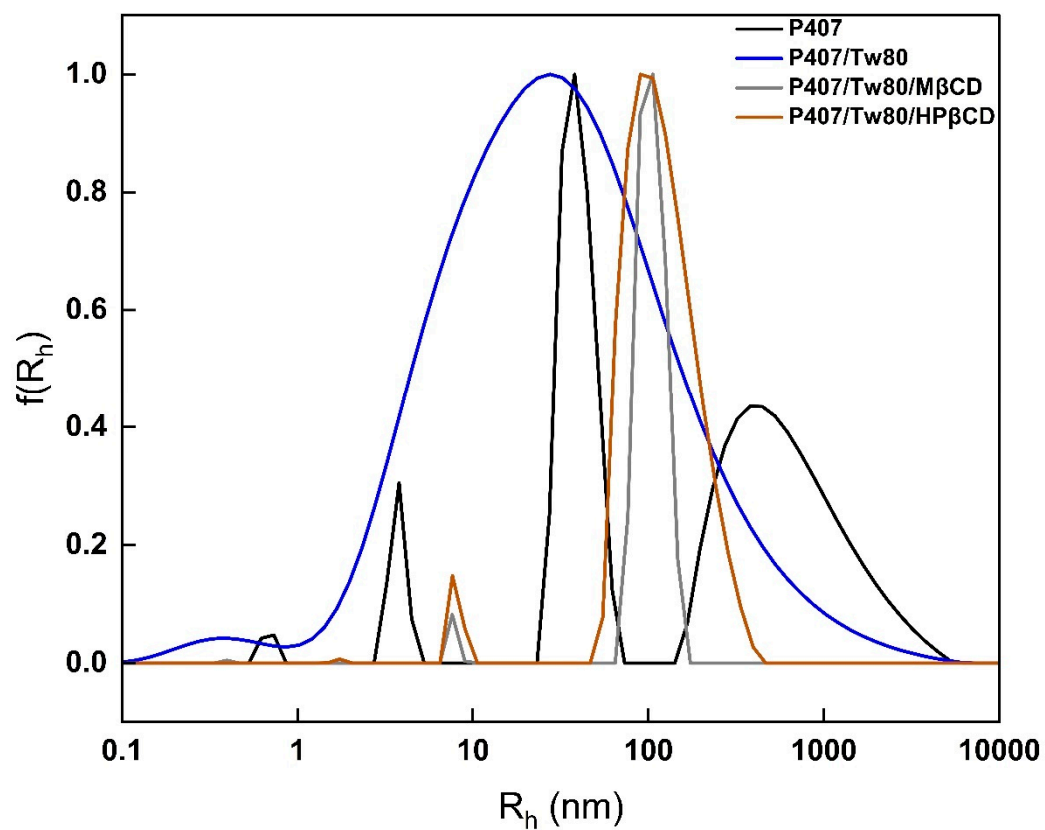

**Figure S1.** Size distributions for P407, P407/Tw80, P407/Tw80/M $\beta$ CD, and P407/Tw80/HP $\beta$ CD systems in aqueous dispersions prepared using the thin-film hydration method (t=0 days).

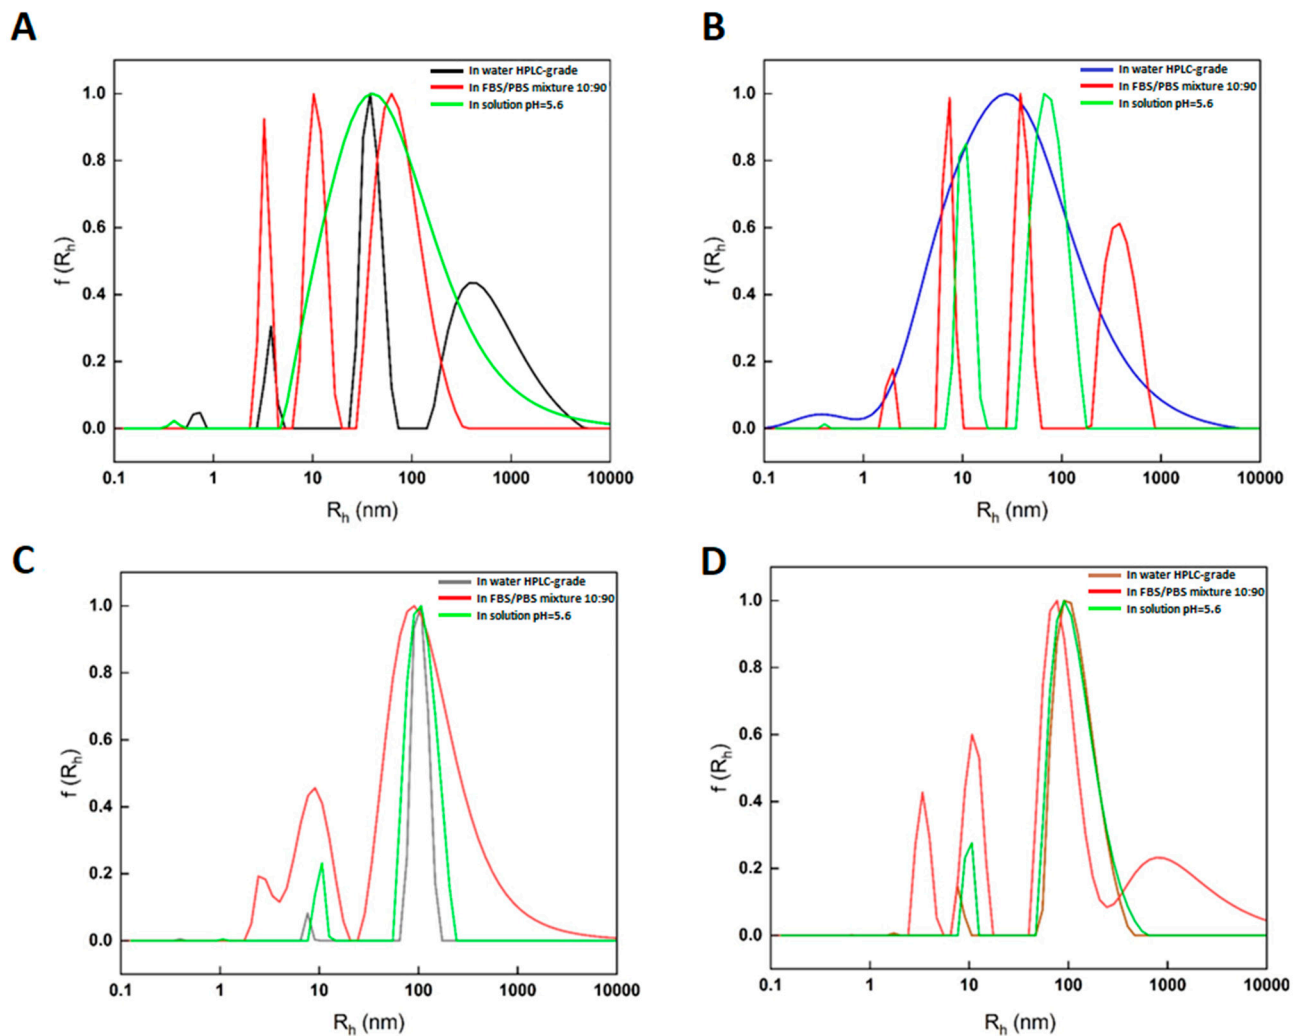

**Figure S2.** Size distributions for (A) P407, (B) P407/Tw80, (C) P407/Tw80/M $\beta$ CD and (D) P407/Tw80/HP $\beta$ CD systems in different dispersion media prepared using the thin-film hydration method ( $t=0$  days).

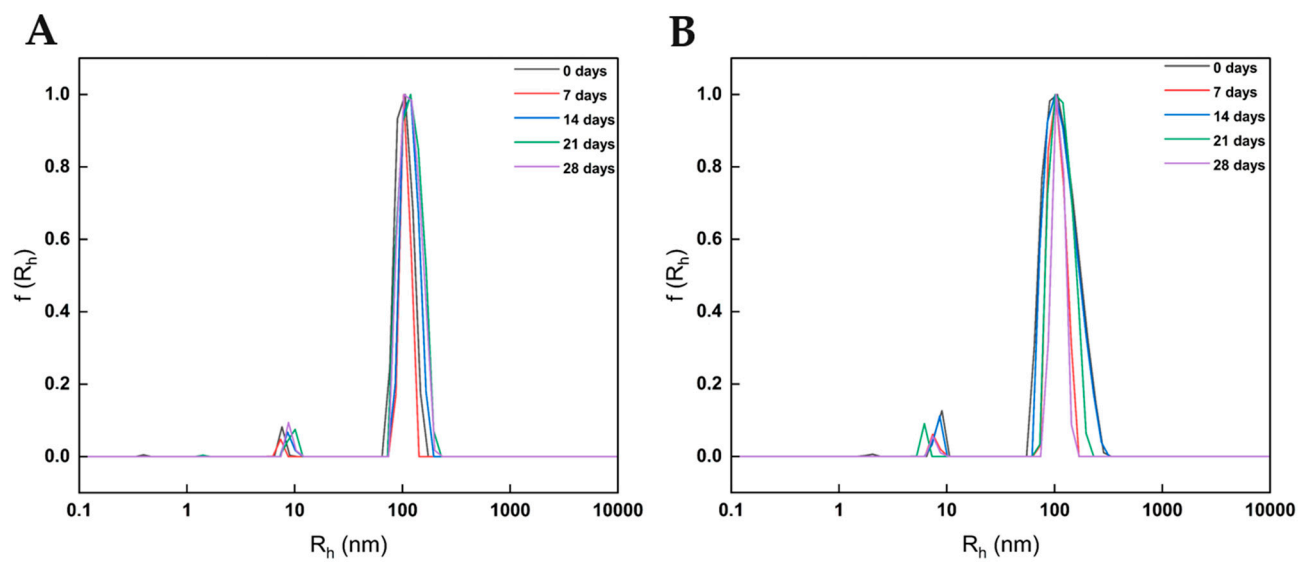

**Figure S3.** Stability assessment of (A) P407/Tw80/M $\beta$ CD and (B) P407/Tw80/HP $\beta$ CD hybrid systems.

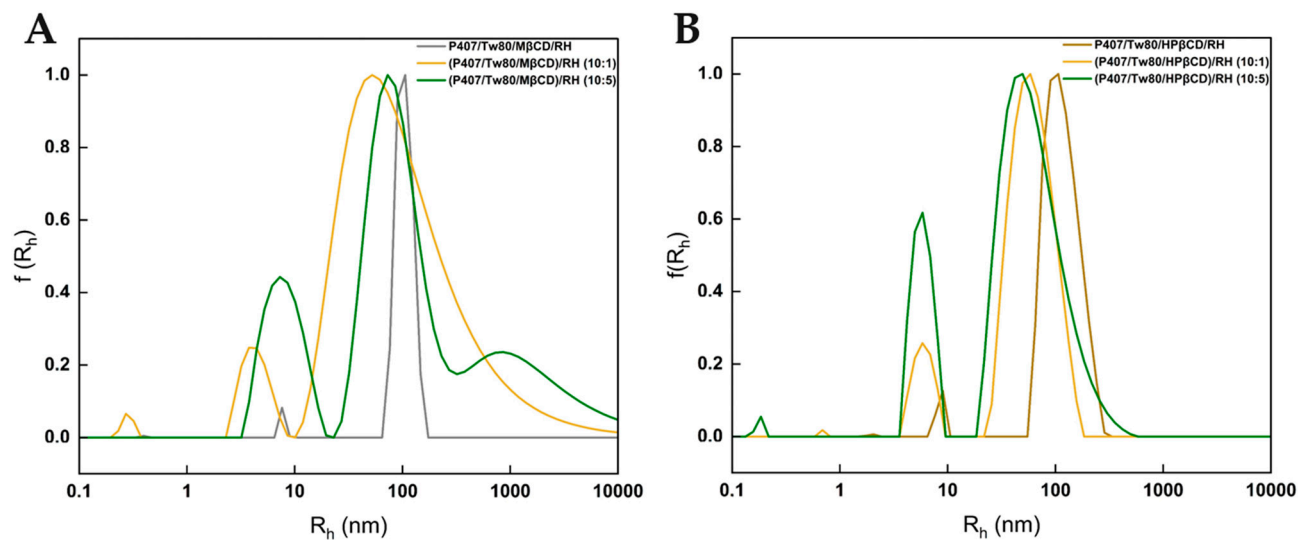

**Figure S4.** Size distribution for the (A) P407/Tw80/M $\beta$ CD system, (P407/Tw80/M $\beta$ CD)/RH in weight ratios of 10:1 and 10:5 and (B) P407/Tw80/HP $\beta$ CD system, (P407/Tw80/HP $\beta$ CD)/RH in weight ratios of 10:1 and 10:5 in aqueous dispersions prepared using the thin-film hydration method ( $t=0$  days).

**Table S1.** Calorimetric heating profiles of pure compounds and their mixtures at the solid state. These calorimetric parameters correspond to the thermograms in Figure 2.

| Sample          | T <sub>onset,m</sub><br>(°C) <sup>a</sup> | T <sub>m</sub><br>(°C) <sup>b</sup> | ΔT <sub>1/2,m</sub><br>(°C) <sup>c</sup> | ΔH <sub>m</sub><br>(KJ mol <sup>-1</sup> ) <sup>d</sup> | T <sub>onset,s</sub><br>(°C) | T <sub>s</sub><br>(°C) | ΔT <sub>1/2,s</sub><br>(°C) | ΔH <sub>s</sub><br>(KJ mol <sup>-1</sup> ) | T <sub>onset,t</sub><br>(°C) | T <sub>t</sub><br>(°C) | ΔT <sub>1/2,t</sub><br>(°C) | ΔH <sub>t</sub><br>(KJ mol <sup>-1</sup> ) |
|-----------------|-------------------------------------------|-------------------------------------|------------------------------------------|---------------------------------------------------------|------------------------------|------------------------|-----------------------------|--------------------------------------------|------------------------------|------------------------|-----------------------------|--------------------------------------------|
| P407            | 53.06                                     | 57.17                               | 4.25                                     | -46.38                                                  | 151.56                       | 157.83                 | 6.53                        | 7.83                                       | –                            | –                      | –                           | –                                          |
| Tw80            | 25.43                                     | 59.50                               | 39.05                                    | -2.07                                                   | –                            | –                      | –                           | –                                          | –                            | –                      | –                           | –                                          |
| MβCD            | 145.13                                    | 179.50                              | 17.63                                    | -1.29                                                   | 68.20                        | 75.33                  | 6.91                        | -0.02                                      | –                            | –                      | –                           | –                                          |
| HPβCD           | 142.17                                    | 147.33                              | 20.30                                    | -5.70                                                   | –                            | –                      | –                           | –                                          | –                            | –                      | –                           | –                                          |
| Tw80/MβCD       | 123.78                                    | 147.50                              | 27.10                                    | 0.50                                                    | 184.83                       | 187.00                 | 6.65                        | -1.07                                      | –                            | –                      | –                           | –                                          |
| Tw80/HPβCD      | 121.29                                    | 132.33                              | 16.19                                    | -0.74                                                   | –                            | –                      | –                           | –                                          | –                            | –                      | –                           | –                                          |
| P407/Tw80       | 45.28                                     | 52.83                               | 6.11                                     | -31.08                                                  | –                            | –                      | –                           | –                                          | –                            | –                      | –                           | –                                          |
| P407/MβCD       | 46.19                                     | 52.83                               | 5.01                                     | -33.54                                                  | 145.37                       | 181.33                 | 98.99                       | 109.92                                     | –                            | –                      | –                           | –                                          |
| P407/HPβCD      | 47.63                                     | 52.83                               | 4.22                                     | -36.08                                                  | 155.03                       | 162.33                 | 7.92                        | 9.85                                       | –                            | –                      | –                           | –                                          |
| P407/Tw80/MβCD  | 46.14                                     | 53.00                               | 7.24                                     | -38.79                                                  | 140.27                       | 153.33                 | 12.90                       | 9.98                                       | 207.45                       | 210.00                 | 7.33                        | -3.42                                      |
| P407/Tw80/HPβCD | 50.20                                     | 55.17                               | 5.92                                     | -32.29                                                  | –                            | –                      | –                           | –                                          | –                            | –                      | –                           | –                                          |

<sup>a</sup>T<sub>onset</sub>: the temperature at which the thermal event starts.

<sup>b</sup>T: the temperature at which heat capacity (ΔC<sub>p</sub>) at constant pressure is maximum.

<sup>c</sup>ΔT<sub>1/2</sub>: half width at the half peak height of the transition.

<sup>d</sup>ΔH: transition enthalpy normalized per mol of each system. m: main transition; s: secondary; t: ternary transition.

**Table S2.** The physicochemical characteristics of hybrid systems in A. FBS/PBS mixture (10:90) and B. buffer solution (pH=5.6 at the temperature of 34 °C).

| <b>A. Dispersed in FBS/PBS mixture</b>                 |            |                                                      |                        |                            |                                                    |                                     |
|--------------------------------------------------------|------------|------------------------------------------------------|------------------------|----------------------------|----------------------------------------------------|-------------------------------------|
| <b>Colloidal dispersions</b>                           | <b>w/w</b> | <b>R<sub>h</sub> (Cumulant)<br/>(nm)<sup>1</sup></b> | <b>PDI<sup>2</sup></b> | <b>Number of<br/>peaks</b> | <b>R<sub>h</sub> (Contin)<br/>(nm)<sup>3</sup></b> | <b>Weight of<br/>Peak (%)</b>       |
| P407                                                   | -          | 47                                                   | 0.4 <sub>8</sub>       | 3                          | 1) 3<br>2) 11<br>3) 75                             | 1) 13%<br>2) 27%<br>3) 60%          |
| P407/Tw80                                              | 70:30      | 38                                                   | 0.5 <sub>0</sub>       | 1                          | 1) 2<br>2) 7<br>3) 40<br>4) 389                    | 1) 4%<br>2) 24%<br>3) 31%<br>4) 41% |
| (P407/Tw80)/MβCD                                       | 80:20      | 95                                                   | 0.4 <sub>9</sub>       | 2                          | 1) 8<br>2) 104                                     | 1) 3%<br>2) 97%                     |
| (P407/Tw80)/HPβCD                                      | 80:20      | 83                                                   | 0.4 <sub>9</sub>       | 2                          | 1) 9<br>2) 114                                     | 1) 3%<br>2) 97%                     |
| <b>B. Dispersed in buffer solution pH=5.6 at 34 °C</b> |            |                                                      |                        |                            |                                                    |                                     |
| <b>Colloidal dispersions</b>                           | <b>w/w</b> | <b>R<sub>h</sub> (Cumulant)<br/>(nm)<sup>1</sup></b> | <b>PDI<sup>2</sup></b> | <b>Number of<br/>peaks</b> | <b>R<sub>h</sub> (Contin)<br/>(nm)<sup>3</sup></b> | <b>Weight of<br/>Peak (%)</b>       |
| P407                                                   | -          | 42                                                   | 0.5 <sub>0</sub>       | 3                          | 62                                                 | 100%                                |
| P407/Tw80                                              | 70:30      | 39                                                   | 0.5 <sub>0</sub>       | 1                          | 1) 11<br>2) 96                                     | 1) 27%<br>2) 73%                    |
| (P407/Tw80)/MβCD                                       | 80:20      | 90                                                   | 0.4 <sub>1</sub>       | 2                          | 1) 10<br>2) 108                                    | 1) 6%<br>2) 94%                     |
| (P407/Tw80)/HPβCD                                      | 80:20      | 86                                                   | 0.4 <sub>2</sub>       | 2                          | 1) 10<br>2) 118                                    | 1) 7%<br>2) 94%                     |

<sup>1</sup> R<sub>h</sub> indicates the average hydrodynamic radius of three replicates of each sample obtained by the Cumulant method

<sup>2</sup> PDI indicates the average polydispersity index, and the first decimal number is the significant one

<sup>3</sup> R<sub>h</sub> indicates the average hydrodynamic radius of three replicates of each sample obtained by the Contin method

**Table S3.** Calorimetric parameters of pure RH, ternary systems and (P407/Tw80/CD)/RH at different weight ratios (10:0.1; 10:0.5; 10:1; 10:5; 10:10) at the solid state, using M $\beta$ CD or HP $\beta$ CD. These calorimetric parameters correspond to the thermograms of Figure 6.

| Sample                       | Weight ratio | T <sub>onset,m</sub><br>(°C) <sup>a</sup> | T <sub>m</sub><br>(°C) <sup>b</sup> | $\Delta T_{1/2,m}$<br>(°C) <sup>c</sup> | $\Delta H_m$<br>(KJmol <sup>-1</sup> ) <sup>d</sup> | T <sub>onset,s</sub><br>(°C) | T <sub>s</sub><br>(°C) | $\Delta T_{1/2,s}$<br>(°C) | $\Delta H_s$<br>(KJmol <sup>-1</sup> ) | T <sub>onset,t</sub><br>(°C) | T <sub>t</sub><br>(°C) | $\Delta T_{1/2,t}$<br>(°C) | $\Delta H_t$<br>(KJmol <sup>-1</sup> ) |
|------------------------------|--------------|-------------------------------------------|-------------------------------------|-----------------------------------------|-----------------------------------------------------|------------------------------|------------------------|----------------------------|----------------------------------------|------------------------------|------------------------|----------------------------|----------------------------------------|
| P407/Tw80/M $\beta$ CD       | -            | 46.14                                     | 53.00                               | 7.24                                    | -18.62                                              | 140.27                       | 153.33                 | 12.90                      | 4.79                                   | 207.45                       | 210.00                 | 7.33                       | -1.64                                  |
| P407/Tw80/HP $\beta$ CD      | -            | 50.20                                     | 55.17                               | 5.92                                    | -32.29                                              | -                            | -                      | -                          | -                                      | -                            | -                      | -                          | -                                      |
| RH                           | -            | 244.62                                    | 248.50                              | 3.59                                    | -22.69                                              | -                            | -                      | -                          | -                                      | -                            | -                      | -                          | -                                      |
| (P407/Tw80/M $\beta$ CD)/RH  | 10:0.1       | 42.51                                     | 49.50                               | 4.94                                    | -11.28                                              | 208.38                       | 220.83                 | 50.62                      | 7.49                                   | -                            | -                      | -                          | -                                      |
| (P407/Tw80/M $\beta$ CD)/RH  | 10:0.5       | 41.13                                     | 48.50                               | 6.67                                    | -11.41                                              | 204.05                       | 205.33                 | 1.97                       | -1.42                                  | -                            | -                      | -                          | -                                      |
| (P407/Tw80/M $\beta$ CD)/RH  | 10:1         | 44.15                                     | 50.17                               | 5.39                                    | -11.38                                              | 237.33                       | 234.42                 | 2.28                       | -1.48                                  | -                            | -                      | -                          | -                                      |
| (P407/Tw80/M $\beta$ CD)/RH  | 10:5         | 42.49                                     | 49.83                               | 7.69                                    | -8.48                                               | 234.33                       | 237.33                 | 3.52                       | -7.49                                  | -                            | -                      | -                          | -                                      |
| (P407/Tw80/M $\beta$ CD)/RH  | 10:10        | 42.09                                     | 48.50                               | 6.37                                    | -6.98                                               | 224.21                       | 230.83                 | 5.74                       | -9.12                                  | 240.52                       | 241.17                 | 1.32                       | -3.17                                  |
| (P407/Tw80/HP $\beta$ CD)/RH | 10:0.1       | 46.76                                     | 50.00                               | 4.02                                    | -13.07                                              | 123.28                       | 141.33                 | 18.15                      | 1.84                                   | 166.33                       | 169.50                 | 10.36                      | -4.24                                  |
| (P407/Tw80/HP $\beta$ CD)/RH | 10:0.5       | 43.56                                     | 51.83                               | 8.75                                    | -12.00                                              | -                            | -                      | -                          | -                                      | -                            | -                      | -                          | -                                      |
| (P407/Tw80/HP $\beta$ CD)/RH | 10:1         | 40.89                                     | 49.50                               | 7.27                                    | -11.40                                              | 117.94                       | 143.83                 | 29.49                      | 4.33                                   | 234.72                       | 237.50                 | 5.27                       | -0.82                                  |
| (P407/Tw80/HP $\beta$ CD)/RH | 10:5         | 40.15                                     | 48.17                               | 6.31                                    | -8.37                                               | 120.98                       | 144.67                 | 17.18                      | 2.22                                   | 206.48                       | 217.33                 | 9.73                       | -6.31                                  |
| (P407/Tw80/HP $\beta$ CD)/RH | 10:10        | 41.44                                     | 49.00                               | 6.01                                    | -6.12                                               | 214.00                       | 225.67                 | 14.20                      | -10.49                                 | -                            | -                      | -                          | -                                      |

<sup>a</sup>T<sub>onset</sub>: the temperature at which the thermal event starts.

<sup>b</sup>T: the temperature at which heat capacity ( $\Delta C_p$ ) at constant pressure is maximum.

<sup>c</sup> $\Delta T_{1/2}$ : half width at the half peak height of the transition.

<sup>d</sup> $\Delta H$ : transition enthalpy normalized per mol of each system. m: main transition; s: secondary; t: trinary transition.



**Table S4.** The flux across the cellulose membrane ( $J_{CM}$ ) (mean  $\pm$  SD, n = 3), the flux ( $J_{NM}$ ) (mean  $\pm$  SEM, n = 4) and the apparent permeability ( $P_{app}$ ) across the nasal mucosa barrier of formulations F1-F4 and RH solution (0.5 mg/mL, PBS pH = 5.6). R-square of regression analysis of the amount of the drug permeated per unit area vs time, across the cellulose membrane and the nasal mucosa barrier are included in the table [ $R^2_{(CM)}$  and  $R^2_{(NM)}$ , respectively].

| Formulation (F) | $J_{CM}$ ( $\mu\text{g}/\text{cm}^2/\text{min}$ ) $\pm$ SD | $R^2_{(CM)}$        | $J_{NM}$ ( $\mu\text{g}/\text{cm}^2/\text{min}$ ) $\pm$ SEM | $R^2_{(NM)}$        | $P_{app}$ (cm/min) |
|-----------------|------------------------------------------------------------|---------------------|-------------------------------------------------------------|---------------------|--------------------|
| F1              | $4.9 \times 10^{-4} \pm 5.1 \times 10^{-5}$                | $0.9492 \pm 0.0053$ | $2.0 \times 10^{-4} \pm 1.0 \times 10^{-5}$                 | $0.9645 \pm 0.0017$ | 0.40               |
| F2              | $5.9 \times 10^{-4} \pm 7.5 \times 10^{-5}$                | $0.9256 \pm 0.0077$ | $2.0 \times 10^{-4} \pm 1.0 \times 10^{-5}$                 | $0.9911 \pm 0.0008$ | 0.40               |
| F3              | $5.5 \times 10^{-4} \pm 5.2 \times 10^{-5}$                | $0.9572 \pm 0.0054$ | $1.7 \times 10^{-4} \pm 1.0 \times 10^{-5}$                 | $0.9825 \pm 0.0010$ | 0.35               |
| F4              | $5.9 \times 10^{-4} \pm 8.9 \times 10^{-5}$                | $0.8978 \pm 0.0092$ | $1.9 \times 10^{-4} \pm 1.0 \times 10^{-5}$                 | $0.9950 \pm 0.0006$ | 0.39               |
| RH solution     | $6.0 \times 10^{-4} \pm 8.2 \times 10^{-5}$                | $0.9157 \pm 0.0085$ | $1.4 \times 10^{-4} \pm 1.0 \times 10^{-5}$                 | $0.9769 \pm 0.0009$ | 0.28               |
